# Supplementary material for: Associations between Serum Betaine, Methyl-Metabolizing Genetic Polymorphisms and Risk of Incident Type 2 Diabetes: A Prospective Cohort Study in Community-Dwelling Chinese Adults
Source: MDPI journal article supplement (doi:10.3390/nu14020362), 2022-01-15
Supplement: s1 [file s1]

## Supplementary materials

### Associations between Serum Betaine, Methyl-Metabolizing Genetic Polymorphisms and Risk of Incident Type 2 Diabetes: A Prospective Cohort Study in Community-Dwelling Chinese Adults

**Table S1.** Baseline characteristics by included and excluded participants<sup>1</sup>

|                                     | Included participants<br>( <i>n</i> = 1565) | Excluded participants<br>( <i>n</i> = 1604) | <i>p</i> |
|-------------------------------------|---------------------------------------------|---------------------------------------------|----------|
| Serum betaine, umol/L               |                                             |                                             |          |
| Females                             | 46.69 ± 17.65                               | 45.44 ± 16.89                               | 0.384    |
| Males                               | 53.84 ± 18.22                               | 53.79 ± 19.80                               |          |
| Age, years                          | 57.51 ± 4.97                                | 57.55 ± 5.36                                | 0.678    |
| WHR                                 | 0.88 ± 0.06                                 | 0.88 ± 0.07                                 | 0.175    |
| Energy intake, kcal/day             | 1822.85 ± 502.93                            | 1887.83 ± 695.72                            | 0.312    |
| Physical activity, MET×hours/day    | 25.71 ± 7.16                                | 25.68 ± 7.43                                | 0.765    |
| Females                             | 1084 (69.3)                                 | 1180 (73.9)                                 | 0.004    |
| Education levels                    |                                             |                                             | 0.597    |
| Less than high school               | 463 (29.6)                                  | 495 (31.3)                                  | 0.786    |
| High school                         | 730 (46.6)                                  | 722 (45.6)                                  |          |
| College or above                    | 372 (23.8)                                  | 367 (23.2)                                  |          |
| Household income, yuan/month/person |                                             |                                             |          |
| <1500                               | 549 (35.1)                                  | 559 (35.7)                                  | 0.315    |
| 1500-3000                           | 713 (45.6)                                  | 717 (45.8)                                  |          |
| ≥3000                               | 303 (19.4)                                  | 288 (18.4)                                  |          |
| Smoking status                      |                                             |                                             |          |
| Non-smoker                          | 1324 (84.6)                                 | 1358 (85.9)                                 | 0.407    |
| Smoker                              | 241 (15.4)                                  | 223 (14.1)                                  |          |
| Alcohol drinking                    |                                             |                                             |          |
| Non-alcohol drinker                 | 1467 (93.7)                                 | 1496 (94.4)                                 | 0.407    |
| Alcohol drinker                     | 98 (6.3)                                    | 88 (5.6)                                    |          |

<sup>1</sup>Data are mean ± SD or *n* (%). Abbreviations: MET: metabolic equivalent tasks; Q1: first quartile; Q2: second quartile; Q3: third quartile; Q4: fourth quartile; WHR: ratio of waist to hip circumference.



**Table S2** Characteristics of the studied SNPs ( $n = 1134$ )

| SNP       | Position   | Gene         | Allel  | Genotype [ $n$ (%)] |            |            |            | MAF(%) | H-W <sup>1</sup> |
|-----------|------------|--------------|--------|---------------------|------------|------------|------------|--------|------------------|
|           |            |              | M/m    | MM                  | Mm         | mm         | Mm+mm      |        |                  |
| rs2274976 | 1:11790870 | <i>MTHFR</i> | G1793A | 878 (77.4)          | 234 (20.6) | 22 (1.9)   | 256 (22.6) | 12.3   | 0.649            |
| rs1801131 | 1:11794419 | <i>MTHFR</i> | A1298C | 686 (60.5)          | 390 (34.4) | 58 (5.1)   | 448 (39.5) | 22.3   | 0.973            |
| rs1801133 | 1:11796321 | <i>MTHFR</i> | C677T  | 645 (56.9)          | 408 (36.0) | 81 (7.1)   | 489 (43.1) | 25.1   | 0.597            |
| rs9001    | 3:53823890 | <i>CHDH</i>  | A318C  | 503 (44.4)          | 508 (44.8) | 123 (10.8) | 631 (55.6) | 33.2   | 0.977            |
| rs3733890 | 5:79126136 | <i>BHMT</i>  | G742A  | 468 (41.3)          | 523 (46.1) | 143 (12.6) | 666 (58.7) | 35.7   | 0.995            |

<sup>1</sup>Calculated with Pearson's Chi-square test. Abbreviations: *BHMT*: betaine-homocysteine methyltransferase; *CHDH*: choline dehydrogenase; H-W: Hardy-Weinberg equilibrium; MAF, minor allele frequency; M/m, major and minor alleles; *MTHFR*: methylenetetrahydrofolate reductase; SNP, single nucleotide polymorphism.

**Table S3** Spearman's correlation coefficients between serum betaine and the studied SNPs ( $n=1134$ )

| $r$                                                | <i>MTHFR</i> G1793A<br>(rs2274976) | <i>MTHFR</i> A1298C<br>(rs1801131) | <i>MTHFR</i> C677T<br>(rs1801133) | <i>CHDH</i> A318C<br>(rs9001) | <i>BHMT</i> G742A<br>(rs3733890) |
|----------------------------------------------------|------------------------------------|------------------------------------|-----------------------------------|-------------------------------|----------------------------------|
| Betaine, $\mu\text{mol/L}$                         | 0.049                              | 0.007                              | 0.023                             | -0.033                        | -0.093                           |
| Sex-specific quartiles of<br>serum betaine (Q1-Q4) | 0.045                              | -0.002                             | 0.021                             | -0.041                        | -0.083                           |

Abbreviations: SNP, single nucleotide polymorphism; *MTHFR*: methylenetetrahydrofolate reductase; *CHDH*: choline dehydrogenase; *BHMT*: betaine-homocysteine methyltransferase; Q1: first quartile; Q2: second quartile; Q3: third quartile; Q4: fourth quartile.



**Table S4** Hazard ratios (HRs) and 95% confidence intervals (CIs) of type 2 diabetes according to sex-specific quartiles of serum level of betaine in subjects with SNPs data ( $n=1134$ )

|                      | Sex-specific quartiles of serum betaine concentrations |                   |                   |                   | <i>p</i> -trend |
|----------------------|--------------------------------------------------------|-------------------|-------------------|-------------------|-----------------|
|                      | Q1( $n = 283$ )                                        | Q2( $n = 283$ )   | Q3( $n = 285$ )   | Q4( $n = 283$ )   |                 |
| Number of cases      | 60                                                     | 42                | 31                | 25                | -               |
| Person years at risk | 2157.72                                                | 2222.67           | 2342.11           | 2294.04           | -               |
| Model 1 <sup>1</sup> | 1.00 (ref)                                             | 0.68 (0.46, 1.01) | 0.48 (0.31, 0.73) | 0.39 (0.25, 0.62) | < 0.001         |
| Model 2 <sup>2</sup> | 1.00 (ref)                                             | 0.68 (0.46, 1.01) | 0.47 (0.31, 0.73) | 0.39 (0.25, 0.62) | < 0.001         |
| Model 3 <sup>3</sup> | 1.00 (ref)                                             | 0.62 (0.41, 0.92) | 0.48 (0.31, 0.74) | 0.39 (0.24, 0.62) | < 0.001         |

<sup>1</sup>Unadjusted. <sup>2</sup>Adjusted for non-modifiable factors, including age (continuous) and sex (females, males). <sup>3</sup>Adjusted additionally for modifiable factors, including smoking status (non-smoker, smoker), alcohol drinking (non-alcohol drinker, alcohol drinker), WHR (continuous), physical activity (continuous), energy intake (continuous). Abbreviations: Q1: first quartile; Q2: second quartile; Q3: third quartile; Q4: fourth quartile.
